# Supplementary material
Source: Royal Society of Chemistry journal article supplement (doi:10.1039/d6ce00172f)
Supplement: d6ce00172f1.pdf [file d6ce00172f1.pdf]

Supporting information

**Coordination pyramid inversion, angular cluster core and  
homochiral single-stranded helix formation in polynuclear Mn(II)  
assemblies supported by bicompartamental salen type ligand based  
on *o*-xylylenediamine platform**

Ilia D. Shutilov,<sup>a</sup> Pavel A. Volodin,<sup>a,b</sup> Lubov V. Frantsuzova,<sup>a</sup> Aidar T. Gubaidullin,<sup>a</sup> Alexander  
S. Ovsyannikov,<sup>a,\*</sup> Svetlana E. Solovieva,<sup>a</sup> Igor S. Antipin<sup>b</sup>

<sup>a</sup>*Arbuzov Institute of Organic and Physical Chemistry, FRC Kazan Scientific Center, Russian Academy of Sciences, Arbuzova 8  
str, Kazan 420088, Russian Federation*

<sup>b</sup>*Kazan Federal University, Kremlevskaya 18 str, Kazan 420008, Russian Federation*

\* *Corresponding author:*

*E-mail address: [osaalex2007@rambler.ru](mailto:osaalex2007@rambler.ru)*

## 1. X-ray diffraction study

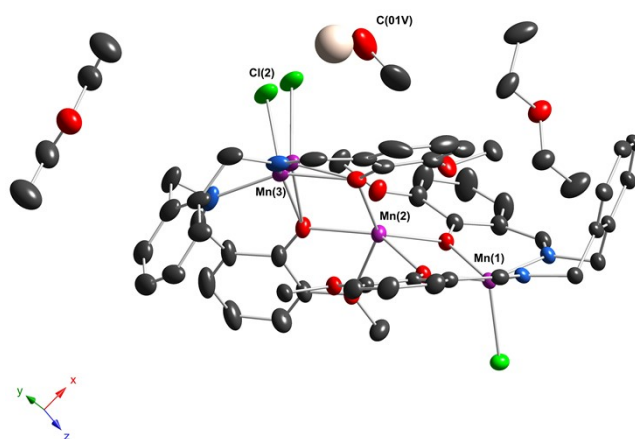

a

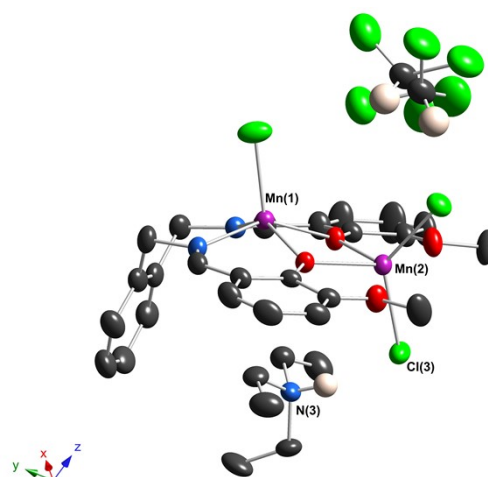

b

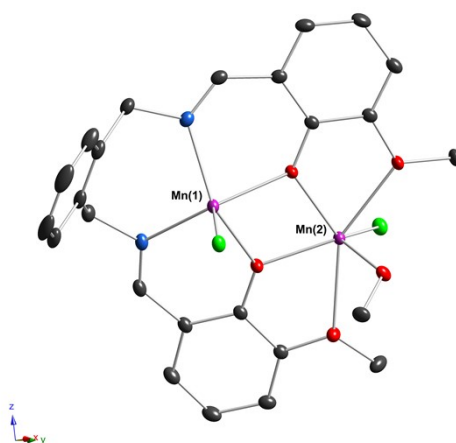

c

**Figure S1.** ORTEP view of asymmetric unit for  $1_2\text{-Mn}_3\text{Cl}_2$  (a),  $1\text{-Mn}_2\text{Cl}_3$  (b) and  $1_2\text{-Mn}_2\text{Cl}_2$  (c). The C-, O-, N-, Cl-, and Mn-atoms are presented as dark grey, red, blue, green, and purple thermal ellipsoids with 30% probability. The H-atoms (pale rose spheres), which are not involved in H-bonding, are omitted for clarity.

## 2. PXRD study

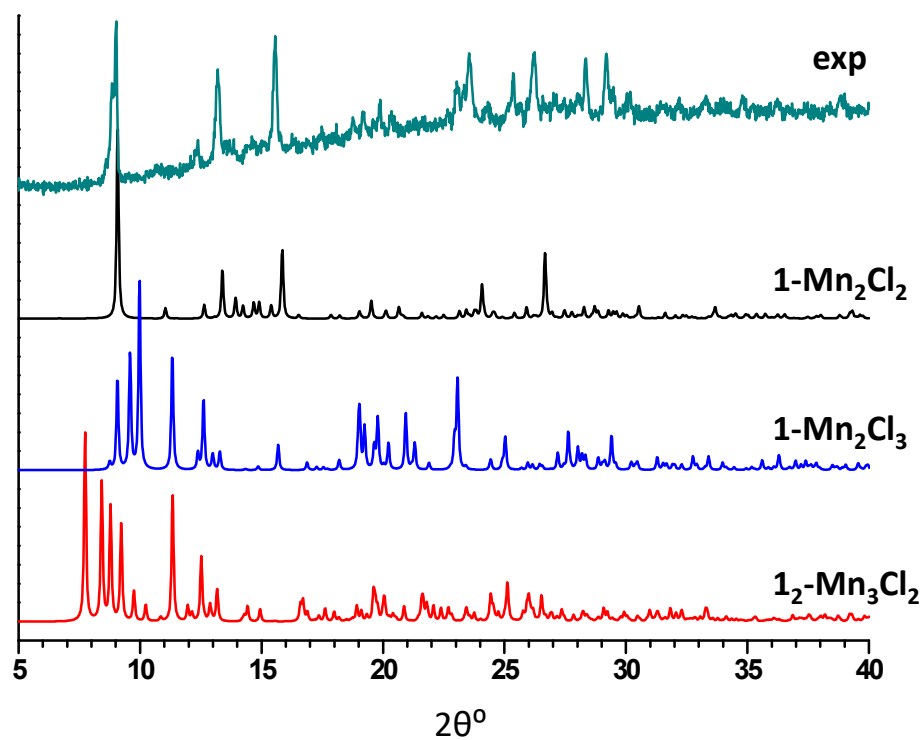

**Figure S2.** A comparison of simulated PXRD patterns for studied  $1_2\text{-Mn}_3\text{Cl}_2$ ,  $1\text{-Mn}_2\text{Cl}_3$  and  $1\text{-Mn}_2\text{Cl}_2$  with the experimental one (exp) of obtained powdered sample.

### 3. Structural parameters for Mn-based complexes

**Table S1.** The coordination bond lengths and angles for **1<sub>2</sub>-Mn<sub>3</sub>Cl<sub>2</sub>**, **1-Mn<sub>2</sub>Cl<sub>3</sub>** and **1-Mn<sub>2</sub>Cl<sub>2</sub>**, according to SCXRD.

|                                                                  |                       | <b>1<sub>2</sub>-Mn<sub>3</sub>Cl<sub>2</sub></b> | <b>1-Mn<sub>2</sub>Cl<sub>3</sub></b>                             | <b>1-Mn<sub>2</sub>Cl<sub>2</sub></b>                                                                                     |
|------------------------------------------------------------------|-----------------------|---------------------------------------------------|-------------------------------------------------------------------|---------------------------------------------------------------------------------------------------------------------------|
| $d_{\text{Mn}(1)/\text{Mn}(3)\dots\text{N}}$ , Å                 | Mn(1)                 | 2.220(4)<br>2.177(3)                              | 2.216(4)<br>2.202(4)                                              | 2.179(1)<br>2.216(1)                                                                                                      |
|                                                                  | Mn(3)                 | 2.154(4)<br>2.202(3)                              |                                                                   |                                                                                                                           |
| $d_{\text{Mn}(1)/\text{Mn}(3)\dots\text{O}}$ , Å                 | Mn(1)                 | 2.095(3)<br>2.115(3)                              | 2.099(3)<br>2.119(3)                                              | 2.112(1)<br>2.113(1)                                                                                                      |
|                                                                  | Mn(3)                 | 2.093(3)<br>2.146(3)                              |                                                                   |                                                                                                                           |
| $d_{\text{Mn}(1)/\text{Mn}(3)\dots\text{Cl}}$ , Å                | Mn(1)                 | 2.372(1)<br>2.383(3)                              | 2.352(2)                                                          | 2.4131(5)                                                                                                                 |
|                                                                  | Mn(3)                 | 2.383(3)                                          |                                                                   |                                                                                                                           |
| $d_{\text{Mn}(2)\dots\text{O}}$ , Å                              |                       | 2.148(3)                                          | 2.424(5)<br>2.157(3)<br>2.168(3)<br>2.406(4)                      | 2.129(1)<br>2.412(1)<br>2.106(1)<br>2.130(1)<br>2.411(1)                                                                  |
|                                                                  |                       | 2.152(3)                                          |                                                                   |                                                                                                                           |
|                                                                  |                       | 2.760(2)                                          |                                                                   |                                                                                                                           |
|                                                                  |                       | 2.346(3)                                          |                                                                   |                                                                                                                           |
|                                                                  |                       | 2.135(3)                                          |                                                                   |                                                                                                                           |
|                                                                  |                       | 2.132(3)<br>2.829(3)                              |                                                                   |                                                                                                                           |
| $d_{\text{Mn}(2)\dots\text{Cl}}$ , Å                             |                       | -                                                 | 2.399(2)<br>2.445(2)                                              | 2.3481(5)                                                                                                                 |
|                                                                  |                       |                                                   |                                                                   |                                                                                                                           |
| $\angle \text{N}_x - \text{Mn}(1)/\text{Mn}(3) - \text{N}_y$ , ° | Mn(1)                 | 101.3(1)                                          | 99.5(2)                                                           | 101.04(5)                                                                                                                 |
|                                                                  | Mn(3)                 | 103.8(2)                                          |                                                                   |                                                                                                                           |
| $\angle \text{N}_x - \text{Mn}(1)/\text{Mn}(3) - \text{O}_y$ , ° |                       | 154.8(1)                                          | 140.4(1)<br>83.9(1)<br>83.0(1)<br>146.5(1)                        | 142.05(5)<br>83.33(5)<br>84.08(5)<br>147.43(5)                                                                            |
|                                                                  | Mn(1)                 | 83.3(1)<br>85.6(1)                                |                                                                   |                                                                                                                           |
|                                                                  |                       | 141.5(1)                                          |                                                                   |                                                                                                                           |
|                                                                  |                       | 155.6(1)                                          |                                                                   |                                                                                                                           |
|                                                                  | Mn(3)                 | 83.5(1)<br>84.2(1)                                |                                                                   |                                                                                                                           |
|                                                                  |                       | 136.0(1)                                          |                                                                   |                                                                                                                           |
| $\angle \text{O}_x - \text{Mn}(1)/\text{Mn}(3) - \text{O}_y$ , ° | Mn(1)                 | 76.66(9)                                          | 74.1(1)                                                           | 73.86(4)                                                                                                                  |
|                                                                  | Mn(3)                 | 75.2(1)                                           |                                                                   |                                                                                                                           |
| $\angle \text{N}_x - \text{Mn}(1)/\text{Mn}(3) - \text{Cl}$ , °  | Mn(1)                 | 93.30(9)<br>104.36(9)                             | 98.4(1)<br>102.7(1)                                               | 108.72(4)<br>107.08(4)                                                                                                    |
|                                                                  | Mn(3)                 | 94.0(1)<br>101.3(1)                               |                                                                   |                                                                                                                           |
| $\angle \text{O}_x - \text{Mn}(1)/\text{Mn}(3) - \text{Cl}$ , °  | Mn(1)                 | 108.52(7)<br>113.58(7)                            | 116.1(1)<br>113.5(1)                                              | 105.41(3)<br>101.78(3)                                                                                                    |
|                                                                  | Mn(3)                 | 107.2(1)<br>121.7(1)                              |                                                                   |                                                                                                                           |
| $\angle \text{O}_x - \text{Mn}(2) - \text{O}_y$ , °              |                       | 80.1(1)                                           | 68.4(1)<br>140.2(1)<br>150.9(2)<br>72.0(1)<br>140.6(1)<br>68.9(1) | 79.35(4)<br>109.44(5)<br>107.29(4)<br>78.04(4)<br>68.91(4)<br>141.88(4)<br>146.76(4)<br>73.64(4)<br>142.34(4)<br>69.00(4) |
|                                                                  |                       | 85.05(9)                                          |                                                                   |                                                                                                                           |
|                                                                  |                       | 101.19(9)                                         |                                                                   |                                                                                                                           |
|                                                                  |                       | 70.5(1)                                           |                                                                   |                                                                                                                           |
|                                                                  |                       | 144.4(1)                                          |                                                                   |                                                                                                                           |
|                                                                  |                       | 85.37(9)                                          |                                                                   |                                                                                                                           |
|                                                                  |                       | 153.6(1)                                          |                                                                   |                                                                                                                           |
|                                                                  |                       | 69.83(9)                                          |                                                                   |                                                                                                                           |
|                                                                  |                       | 144.37(9)                                         |                                                                   |                                                                                                                           |
|                                                                  |                       | 80.8(1)                                           |                                                                   |                                                                                                                           |
|                                                                  |                       | 101.10(9)                                         |                                                                   |                                                                                                                           |
|                                                                  |                       | 151.67(8)                                         |                                                                   |                                                                                                                           |
|                                                                  |                       | 87.4(1)                                           |                                                                   |                                                                                                                           |
|                                                                  |                       | 74.79(9)                                          |                                                                   |                                                                                                                           |
|                                                                  | 144.7(1)<br>129.16(9) |                                                   |                                                                   |                                                                                                                           |

|                                     |           |           |           |
|-------------------------------------|-----------|-----------|-----------|
|                                     | 133.11(8) |           |           |
|                                     | 68.79(9)  |           |           |
|                                     | 97.81(9)  |           |           |
|                                     | 133.6(1)  |           |           |
|                                     | 62.37(8)  |           |           |
|                                     | 75.89(9)  |           |           |
|                                     | 74.6(1)   |           |           |
|                                     | 77.22(8)  |           |           |
|                                     | 60.7(1)   |           |           |
|                                     | 71.38(9)  |           |           |
|                                     | 130.5(1)  |           |           |
|                                     | 114.74(9) |           |           |
|                                     |           | 82.1(1)   |           |
|                                     |           | 118.6(1)  |           |
|                                     |           | 114.5(1)  | 121.76(4) |
|                                     |           | 82.9(1)   | 86.10(3)  |
| $\angle O_x - Mn(2) - Cl_y, ^\circ$ | -         | 128.81(6) | 116.92(3) |
|                                     |           | 85.0(1)   | 117.83(3) |
|                                     |           | 101.6(1)  | 85.42(3)  |
|                                     |           | 106.9(1)  |           |
|                                     |           | 85.2(1)   |           |

**Table S2.** The Mn-O-Mn angles within the cluster core for **1<sub>2</sub>-Mn<sub>3</sub>Cl<sub>2</sub>**, **1-Mn<sub>2</sub>Cl<sub>3</sub>** and **1-Mn<sub>2</sub>Cl<sub>2</sub>**, according to SCXRD.

|                              | <b>1<sub>2</sub>-Mn<sub>3</sub>Cl<sub>2</sub></b> | <b>1-Mn<sub>2</sub>Cl<sub>3</sub></b> | <b>1-Mn<sub>2</sub>Cl<sub>2</sub></b> |
|------------------------------|---------------------------------------------------|---------------------------------------|---------------------------------------|
| $\angle Mn - O - Mn, ^\circ$ | 104.7(1)                                          |                                       |                                       |
|                              | 103.9(1)                                          | 105.9(1)                              | 105.64(5)                             |
|                              | 105.9(1)                                          | 104.8(1)                              | 104.83(5)                             |
|                              | 104.2(1)                                          |                                       |                                       |

**Table S3.** CShM distortion parameter for Mn<sup>II</sup>-N<sub>2</sub>O<sub>2</sub>Cl coordination polyhedrons in **1<sub>2</sub>-Mn<sub>3</sub>Cl<sub>2</sub>**, **1-Mn<sub>2</sub>Cl<sub>3</sub>** and **1-Mn<sub>2</sub>Cl<sub>2</sub>**, calculated by *SHAPE*<sup>1</sup>.

| Compound                                          | Mn    | PP-5   | vOC-5 | TBPY-5       | SPY-5        | JTBPY-5 |
|---------------------------------------------------|-------|--------|-------|--------------|--------------|---------|
| <b>1<sub>2</sub>-Mn<sub>3</sub>Cl<sub>2</sub></b> | Mn(1) | 26.574 | 4.020 | 4.082        | <b>1.679</b> | 7.409   |
|                                                   | Mn(3) | 24.964 | 5.210 | 3.914        | <b>2.628</b> | 7.453   |
| <b>1-Mn<sub>2</sub>Cl<sub>3</sub></b>             | Mn(1) | 26.297 | 4.540 | 5.516        | <b>1.628</b> | 9.303   |
| <b>1-Mn<sub>2</sub>Cl<sub>2</sub></b>             | Mn(1) | 35.266 | 9.548 | <b>4.015</b> | 5.968        | 6.831   |

| Label   | Shape                          | Symmetry               |
|---------|--------------------------------|------------------------|
| PP-5    | Pentagon                       | <i>D</i> <sub>5h</sub> |
| vOC-5   | Vacant octahedron              | <i>C</i> <sub>4v</sub> |
| TBPY-5  | Trigonal bipyramid             | <i>D</i> <sub>3h</sub> |
| SPY-5   | Spherical square pyramid       | <i>C</i> <sub>4v</sub> |
| JTBPY-5 | Johnson trigonal bipyramid J12 | <i>D</i> <sub>3h</sub> |

**Table S4.** Comparison of CShM distortion parameters, calculated by *SHAPE*<sup>1</sup>, for Mn<sup>II</sup>-O<sub>8</sub> coordination polyhedron in **1<sub>2</sub>-Mn<sub>3</sub>Cl<sub>2</sub>** in comparison with those observed for earlier reported analogues [Zn<sup>II</sup>-Mn<sup>II</sup>-Zn<sup>II</sup>]<sup>2</sup> and [Ni<sup>II</sup>-Mn<sup>II</sup>-Ni<sup>II</sup>]<sup>3</sup>.

|                                                         | OP-8   | HPY-8  | HBPY-8 | CU-8   | SAPR-8 | TDD-8       | JGBF-8 | JETBPY-8 | JBTPR-8 | BTPR-8 | JSD-8  | TT-8   | ETBPY-8 |
|---------------------------------------------------------|--------|--------|--------|--------|--------|-------------|--------|----------|---------|--------|--------|--------|---------|
| <b>1<sub>2</sub>-Mn<sub>3</sub>Cl<sub>2</sub></b>       | 29.79  | 21.82  | 16.79  | 12.63  | 5.08   | <b>3.15</b> | 14.62  | 24.56    | 5.06    | 3.77   | 4.22   | 12.75  | 20.93   |
| [Zn <sup>II</sup> -Mn <sup>II</sup> -Zn <sup>II</sup> ] | 32.451 | 21.212 | 13.135 | 11.189 | 8.184  | 5.948       | 13.143 | 21.720   | 6.660   | 5.305  | 8.657  | 11.872 | 15.212  |
| [Ni <sup>II</sup> -Mn <sup>II</sup> -Ni <sup>II</sup> ] | 28.215 | 23.735 | 11.803 | 14.654 | 13.714 | 13.227      | 15.573 | 26.328   | 12.185  | 10.478 | 14.171 | 15.121 | 23.570  |

| Label | Shape   | Symmetry               |
|-------|---------|------------------------|
| OP-8  | Octagon | <i>D</i> <sub>8h</sub> |

|          |                                            |          |
|----------|--------------------------------------------|----------|
| HPY-8    | Heptagonal pyramid                         | $C_{7v}$ |
| HBPY-8   | Hexagonal bipyramid                        | $D_{6h}$ |
| CU-8     | Cube                                       | $O_h$    |
| SAPR-8   | Square antiprism                           | $D_{4d}$ |
| TDD-8    | Triangular dodecahedron                    | $D_{2d}$ |
| JGBF-8   | Johnson gyrobifastigium J26                | $D_{2d}$ |
| JETBPY-8 | Johnson elongated triangular bipyramid J14 | $D_{3h}$ |
| JBTPR-8  | Biaugmented trigonal prism J50             | $C_{2v}$ |
| BTPR-8   | Biaugmented trigonal prism                 | $C_{2v}$ |
| JSD-8    | Snub diphenoid J84                         | $D_{2d}$ |
| TT-8     | Triakis tetrahedron                        | $T_d$    |
| ETBPY-8  | Elongated trigonal bipyramid               | $D_{3h}$ |

**Table S5.** CShM distortion parameters for  $Mn^{II}-O_4Cl_2$  and  $Mn^{II}-O_5Cl$  coordination polyhedrons in **1-Mn<sub>2</sub>Cl<sub>3</sub>** and **1-Mn<sub>2</sub>Cl<sub>2</sub>**, respectively, calculated by *SHAPE*<sup>1</sup>.

| Compound                              | Mn                | HP-6   | PPY-6 | OC-6   | TPR-6        | JPPY-6 |
|---------------------------------------|-------------------|--------|-------|--------|--------------|--------|
| <b>1-Mn<sub>2</sub>Cl<sub>3</sub></b> | $Mn^{II}-O_4Cl_2$ | 33.122 | 7.974 | 16.753 | <b>6.191</b> | 12.308 |
| <b>1-Mn<sub>2</sub>Cl<sub>2</sub></b> | $Mn^{II}-O_5Cl$   | 33.526 | 8.868 | 17.555 | <b>7.237</b> | 11.865 |

| Label  | Shape                         | Symmetry |
|--------|-------------------------------|----------|
| HP-6   | Hexagon                       | $D_{6h}$ |
| PPY-6  | Pentagonal pyramid            | $C_{5v}$ |
| OC-6   | Octahedron                    | $O_h$    |
| TPR-6  | Trigonal prism                | $D_{3h}$ |
| JPPY-6 | Johnson pentagonal pyramid J2 | $C_{5v}$ |

## References

---

- 1 M. Llunell, D. Casanova, J. Cirera, J. M. Bofill, P. Alemany, S. Alvarez, M. Pinsky and D. Avnir, *SHAPE, version 2.1*, University of Barcelona and Hebrew University of Jerusalem, 2013.
- 2 L. Dou, L. Tong, Y.-B. Yan, J.-Y. Xu, Y.-X. Sun and W. Guan, *J. Struct. Chem.*, **2022**, *63*, 1242–1255.
- 3 E. Pilichos, M. Font-Bardia, G. Aullón, J. Mayans and A. Escuer, *Inorg. Chem.*, **2024**, *63*, 20415–20426.
